# Supplementary material
Source: publisher site journal article supplement (https://www.spandidos-publications.com/2743/downloadSupplementary)
Supplement: Supplementary file 1 [file downloadSupplementary]

## Sheet: Table SI
Table SI. Inclusion list in parallel‑reaction monitoring. CS, charges. NE, collision energy.
Mass [m/z]	Formula [M]	Formula type	Species	CS [z]	Polarity	Start [min]	End [min]	Name	(N)CE
375.215				2	Positive	4.88	20.88		25
388.475				4	Positive	12.52	28.52		25
398.289				2	Positive	30	46		25
421.243				3	Positive	44	60		25
443.281				2	Positive	31.76	47.76		25
455.735				2	Positive	0	16		25
470.942				3	Positive	39.79	55.79		25
476.279				2	Positive	18.19	34.19		25
482.721				2	Positive	0	16		25
487.257				2	Positive	0	16		25
491.308				2	Positive	23.56	39.56		25
495.886				3	Positive	10.53	26.53		25
517.632				3	Positive	12.52	28.52		25
522.959				3	Positive	33.78	49.78		25
542.748				2	Positive	0	16		25
547.298				2	Positive	11.2	27.2		25
555.806				2	Positive	29.46	45.46		25
566.963				3	Positive	44	60		25
567.323				2	Positive	29.86	45.86		25
573.037				4	Positive	30.29	46.29		25
586.614				3	Positive	14.59	30.59		25
593.787				2	Positive	7.12	23.12		25
593.984				3	Positive	29.02	45.02		25
602.304				3	Positive	22.45	38.45		25
622.854				2	Positive	33.1	49.1		25
631.361				2	Positive	44	60		25
635.845				2	Positive	38.93	54.93		25
636.869				2	Positive	39.98	55.98		25
637.375				3	Positive	39.22	55.22		25
643.377				2	Positive	22.08	38.08		25
644.823				2	Positive	1.97	17.97		25
652.643				3	Positive	41.99	57.99		25
656.38				2	Positive	27.31	43.31		25
664.383				2	Positive	32.97	48.97		25
669.838				2	Positive	14.23	30.23		25
672.021				3	Positive	36.91	52.91		25
675.856				2	Positive	25.93	41.93		25
683.828				2	Positive	7.26	23.26		25
683.854				2	Positive	16.54	32.54		25
691.833				2	Positive	21.14	37.14		25
696.789				2	Positive	21.21	37.21		25
699.338				2	Positive	19.85	35.85		25
705.909				2	Positive	39.79	55.79		25
720.821				2	Positive	0	16		25
726.836				2	Positive	24.89	40.89		25
763.438				2	Positive	44	60		25
763.713				3	Positive	30.29	46.29		25
765.612				4	Positive	37.47	53.47		25
765.942				2	Positive	44	60		25
776.93				2	Positive	44	60		25
791.665				3	Positive	20.12	36.12		25
836.457				2	Positive	19.94	35.94		25
843.41				2	Positive	15.23	31.23		25
844.429				2	Positive	15.66	31.66		25
847.914				2	Positive	26.05	42.05		25
849.94				2	Positive	44	60		25
870.92				2	Positive	22.02	38.02		25
879.417				2	Positive	14.59	30.59		25
890.483				3	Positive	44	60		25
899.52				2	Positive	43.91	59.91		25
904.949				2	Positive	25.27	41.27		25
917.98				2	Positive	44	60		25
951.935				2	Positive	22.65	38.65		25
1075.94				2	Positive	22.52	38.52		25
1111.06				2	Positive	34.48	50.48		25
